# Supplementary material for: Projected resurgence of COVID-19 in the United States in July—December 2021 resulting from the increased transmissibility of the Delta variant and faltering vaccination
Source: eLife. 2022 Jun 21;11:e73584. doi: 10.7554/eLife.73584 (PMC9232215; doi:10.7554/eLife.73584)
Supplement: Supplementary file 1. — This table details a summary of core model assumptions for the nine included models (arranged alphabetically). [file elife-73584-supp1.xlsx]

## Sheet: Sheet1
Model	Model Type	Geography	Mobility and contact data	Age groups	Waning of natural immunity	Waning of vaccine immunity	Importations	Multiple strains	NPI history	NPI relaxation	VE against infection	R0 wild strain
CU-AGE-ST	Combined meta-population and compartmental	County	SafeGraph mobility, POLYMOD contact rates	5	None	None	No	Proportion of variant cases be time imported from simplified two-strain model	Fitted transmissibility. No additional NPI relaxation imposed in the projections	Maximum relaxation reached	Same as VE disease	Estimated in each county based on observed cases
JHUAPL_Bucky	Meta-population compartmental	County	SafeGraph mobility, age-based contact matrices	16	None	None	No	Proportion of variant cases estimated from simplified model	Fitted based on transmission rates	Linear	Same as VE disease	2.4 (mean)
JHU_IDD-CovidSP	Meta-population compartmental	State	Commuting	Age-adjusted for vacc, hosp, and death	None	None	No	No	Fitted based on state-level reported periods of changing policy	Linear	Same as VE disease	2.3
Karlen-pypm	Discrete time compartmental	State	Not used	None	Gamma distribution: mean 395 days, standard deviation 50 days	Gamma distribution: mean 365 days, standard deviation 50 days	No	Three strains (original, alpha, delta)	Proxied by estimated transmission rates	NPIs held constant	Same as VE disease	2.5
MOBS_NEU- GLEAM_COVID	Meta-population compartmental	County	Google mobility, commuting, flight, age-based contact matrices	10	None	Leaky vaccine	Domestic/International	2 strains	Mobility + Oxford data	Linear	Differs from VE disease	Prior in [1.6, 3.8]. Posterior defined by the model calibration in each state.
UNCC-hierbin	Trajectory tracking (non-mechanistic)	State	Not used	None	None	None	None	No	Based on historical data	NPIs held constant	Same as VE disease	NA (due to non-mechanistic nature of the model)
USC-SIkJalpha	Discrete time heterogeneous rate compartmental	State	Cuebiq contact socres data to model future NPI changes	10	None	Leaky vaccine	No	Separate model for each strain	Cuebiq data to assess current contact scores	Linear	Same as VE disease	Estimated from current data for current contact scores, and adjusted to pre-COVID contact scores
UVA-adaptive	Meta-population compartmental	County	Not used	Hosp and death outcomes adjusted for 3 age groups	None	None	Low steady importation per county, 1 per million population	No	Modeled by proxy using fitted transmissibility	Linear	Same as VE disease	Variable, estimate intrinsic transmissibility and NPI effects through fitting of transmission rates from observed case series
UVA-EpiHiper	Agent-based	Building locations	ACS Commute, National Household Travel Survey	5	None	None	None	2 strains	NPIs are modeled but their history is not since the model summarizes cumulative history in initializations	NPIs held constant	Same as VE disease	NA (wild type not explicitly modeled, model initialized with alpha variant with calibrated R_effective which varies among states)
