# Supplementary figures and images for: Projected resurgence of COVID-19 in the United States in July—December 2021 resulting from the increased transmissibility of the Delta variant and faltering vaccination
Source: eLife journal article supplement (doi:10.7554/elife.73584), 2022-06-06

# Individual model projections & 95% projection intervals – Reported Cases

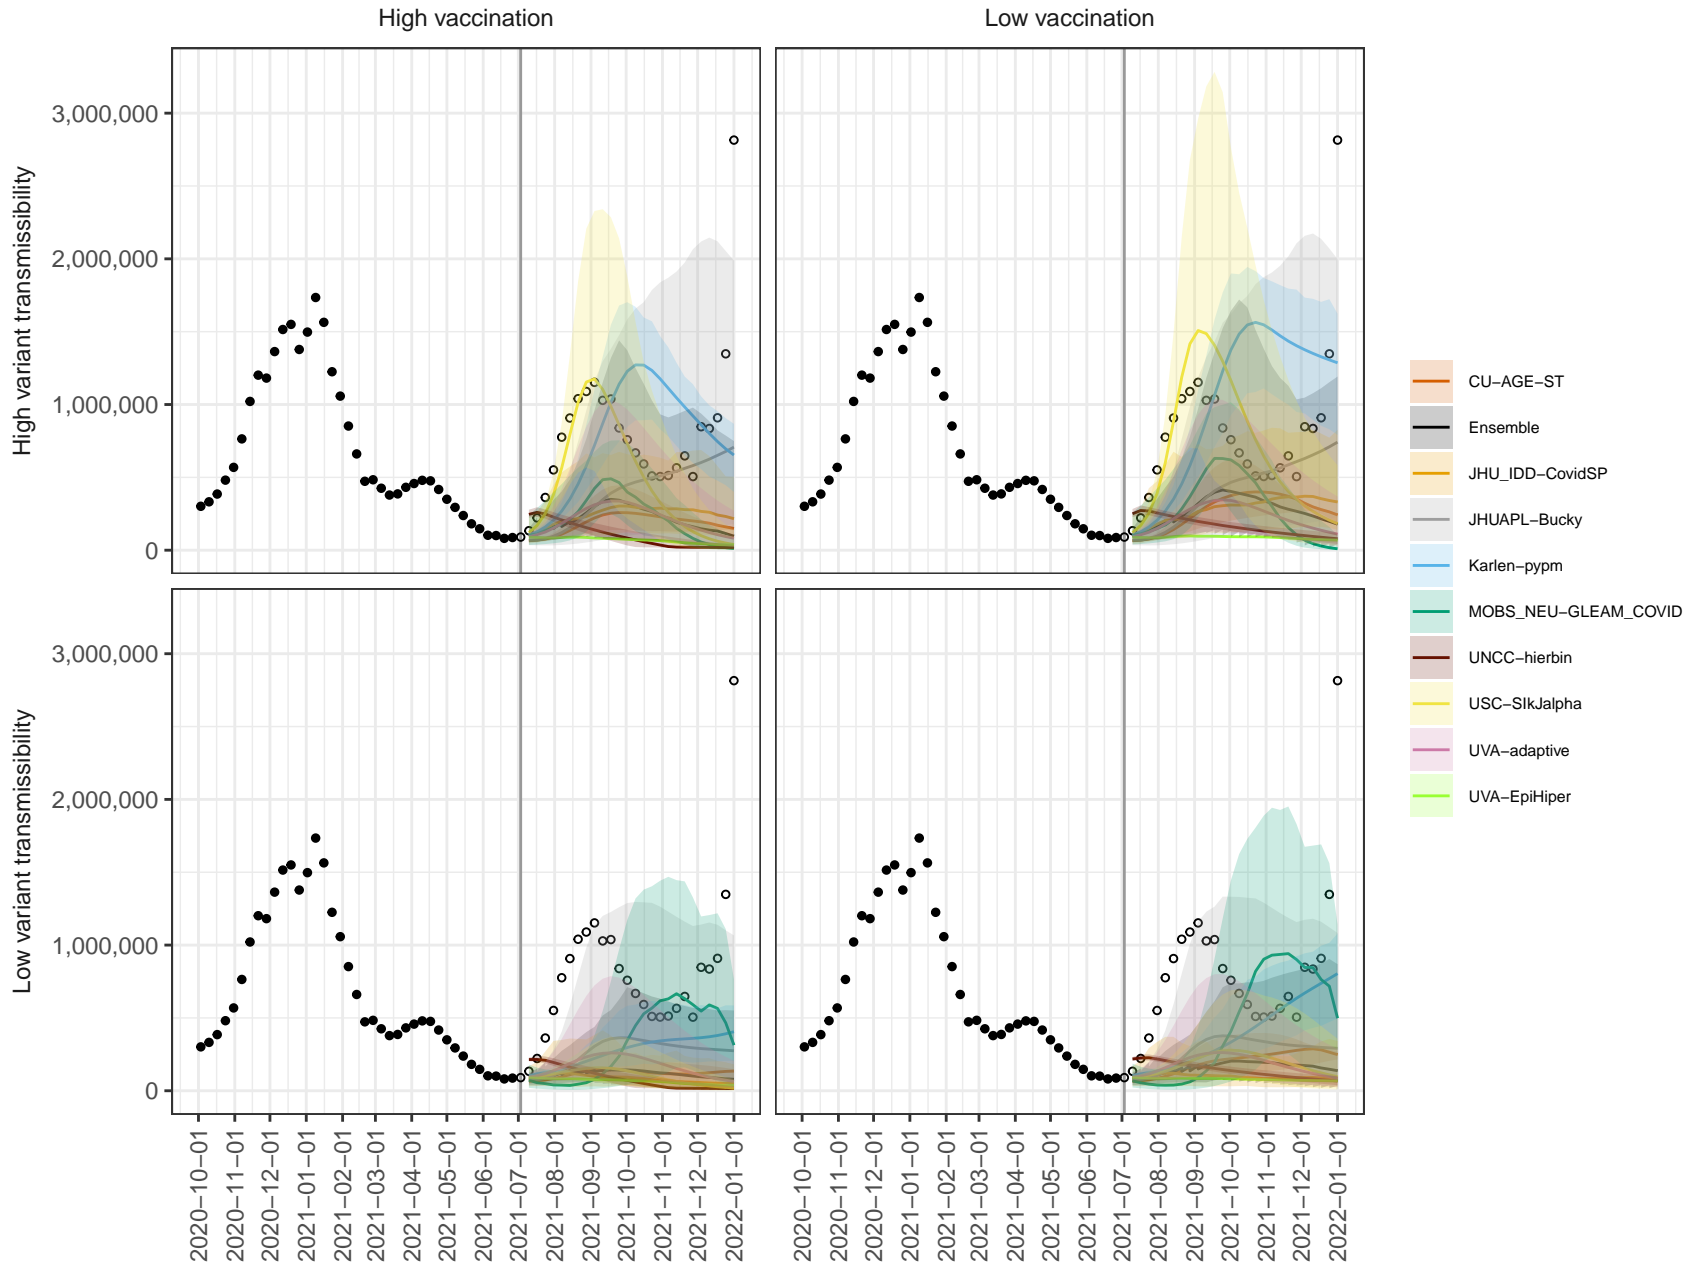

Supplement: supp [file elife_poa_e73584_Figure_1_figure_supplement_1.pdf › elife_poa_e73584_Figure_1_figure_supplement_1.pdf]

# Individual model projections & 95% projection intervals – Hospitalizations

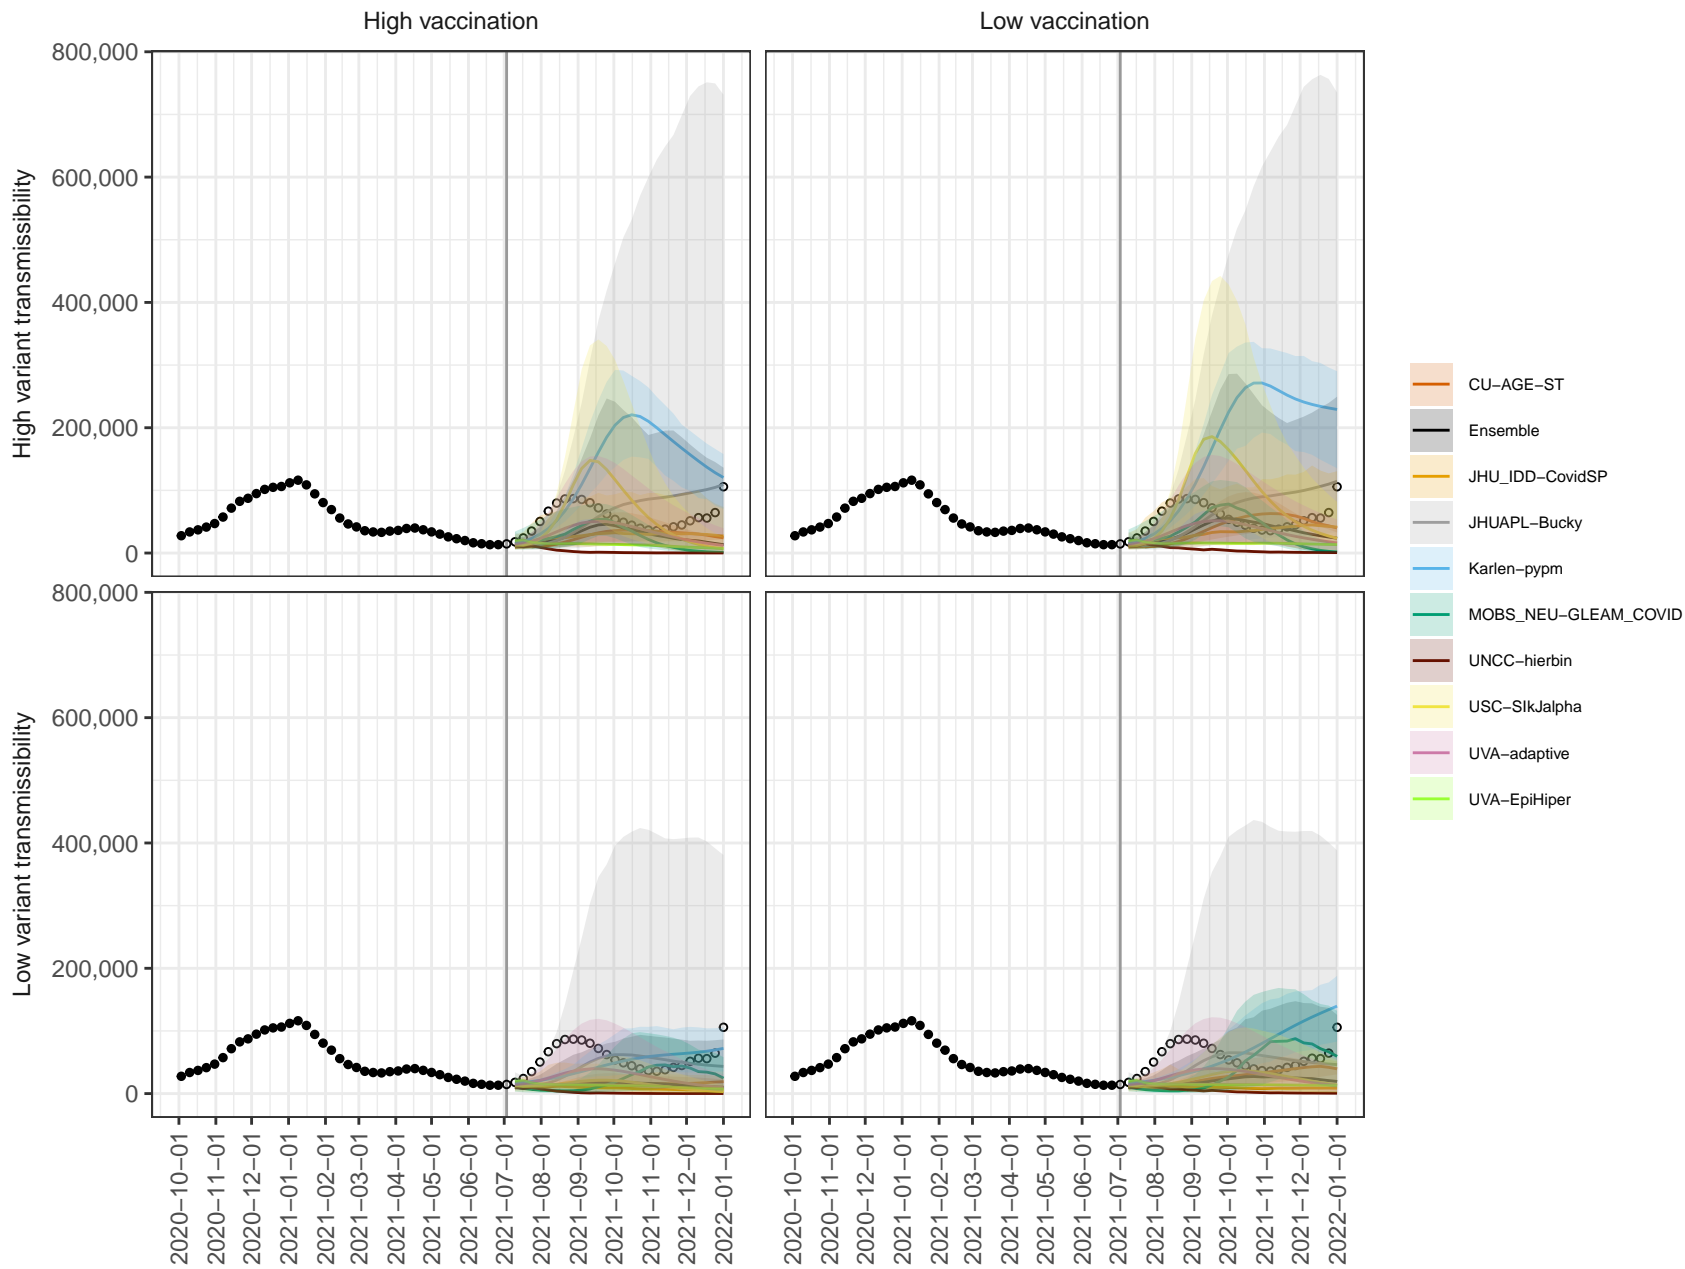

Supplement: supp [file elife_poa_e73584_Figure_1_figure_supplement_2.pdf › elife_poa_e73584_Figure_1_figure_supplement_2.pdf]

# Individual model projections & 95% projection intervals – Deaths

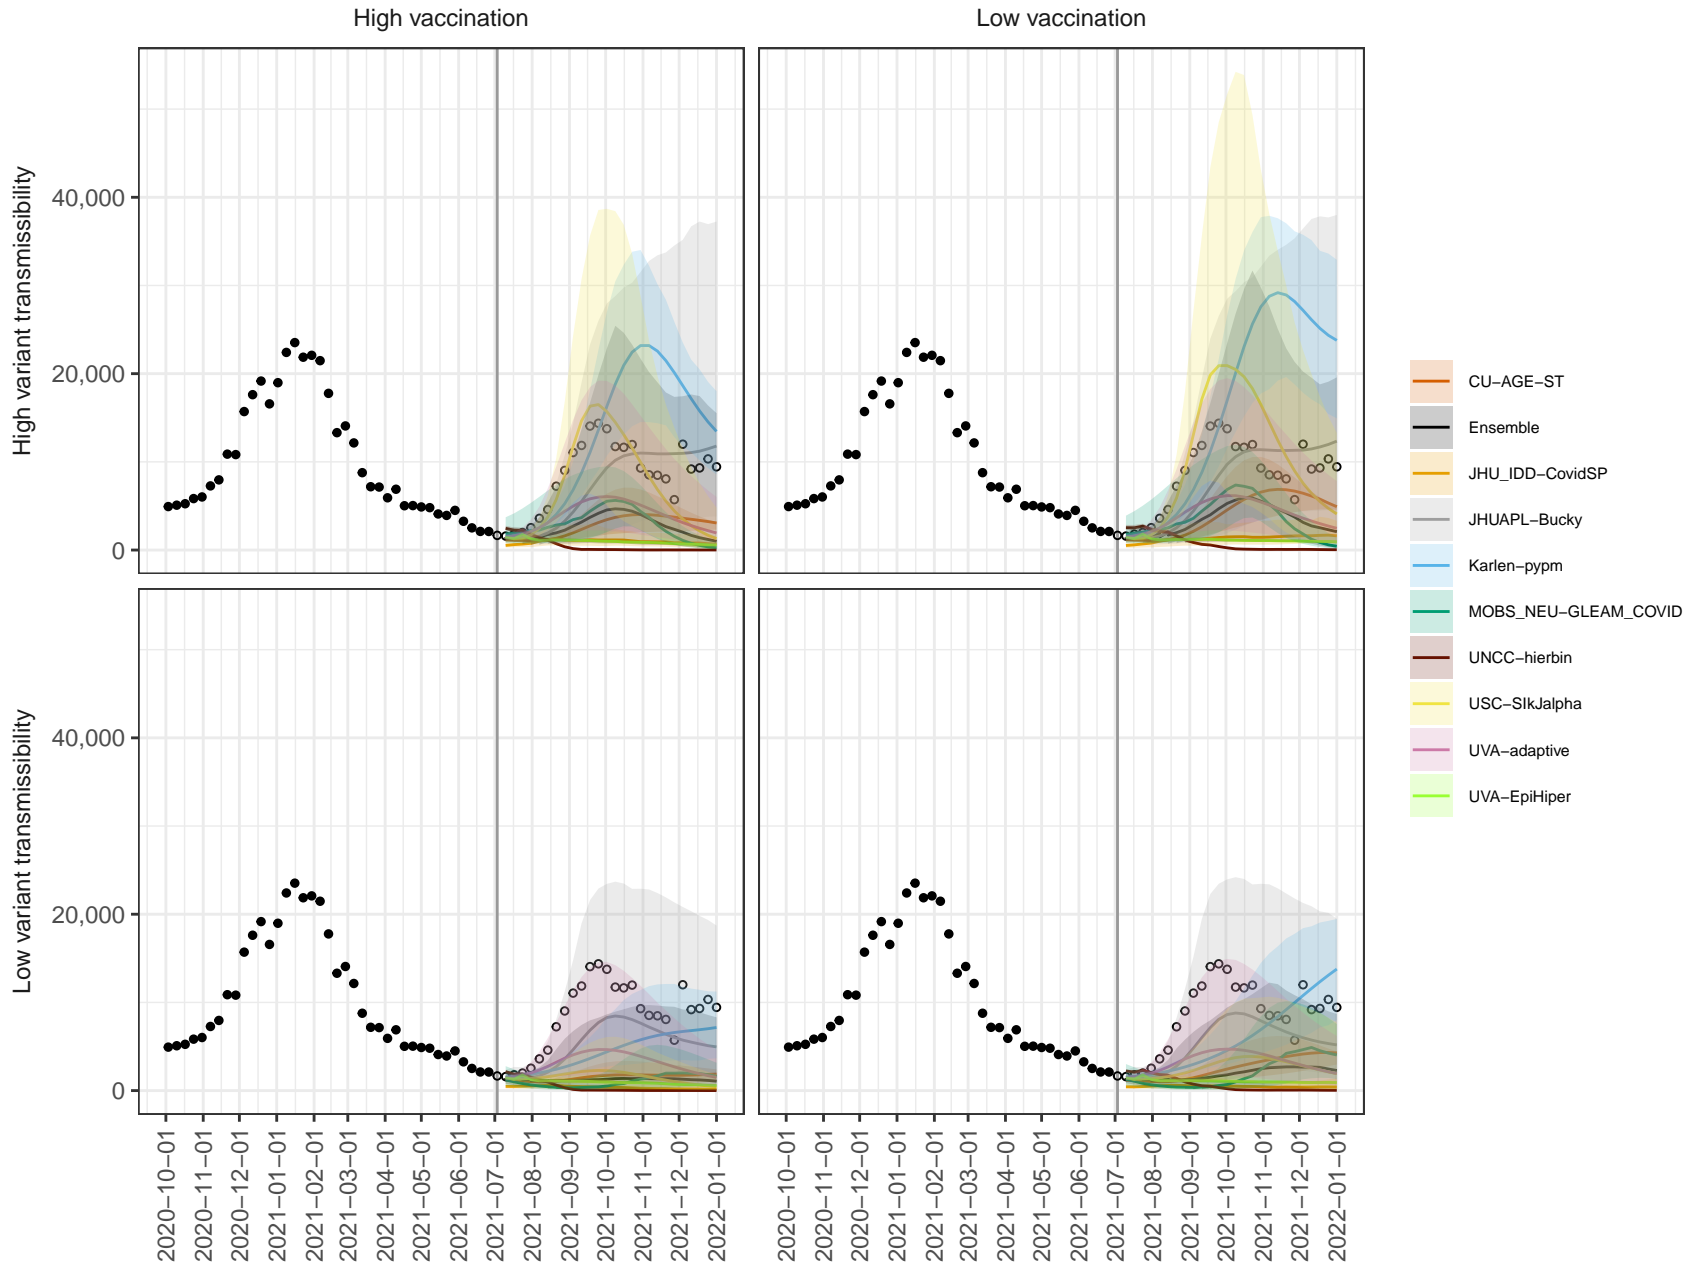

Supplement: supp [file elife_poa_e73584_Figure_1_figure_supplement_3.pdf › elife_poa_e73584_Figure_1_figure_supplement_3.pdf]
